# Supplementary material for: Band alignment control in a blue phosphorus/C2N van der Waals heterojunction using an electric field
Source: Royal Society of Chemistry journal article supplement (doi:10.1039/c9cp06696a), 2020-01-01
Supplement: c9cp06696a1.pdf [file c9cp06696a1.pdf]

## Band Alignment Control in Blue Phosphorus/C<sub>2</sub>N Van Der Waals Heterojunction by Electric Field

Zhihui Zhang,<sup>a</sup> Zifeng Xie,<sup>a</sup> Jian Liu,<sup>b</sup> Ye Tian,<sup>c</sup> Yan Zhang,<sup>a</sup> Xing Wei,<sup>a</sup> Tingting Guo,<sup>a</sup> Lei Ni,<sup>a</sup>  
Jibin Fan,<sup>a</sup> Yijun Weng,<sup>a</sup> Zhengdi Zha,<sup>a</sup> and Li Duan<sup>a,\*</sup>

<sup>a</sup> *School of Materials Science and Engineering, Chang'an University, Xi'an, 710064, China*

<sup>b</sup> *School of Physics, Shandong University, Jinan 250100, China*

<sup>c</sup> *Institute of Physics, Chinese Academy of Sciences, Beijing 100190, China*

\*Corresponding author.

E-mail address: [liduan@chd.edu.cn](mailto:liduan@chd.edu.cn).

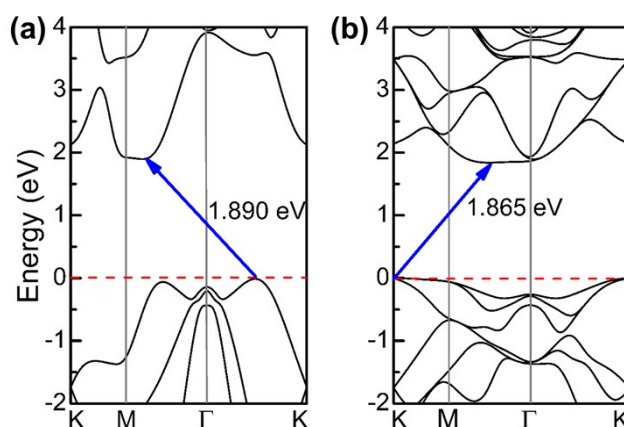

**Fig. S1** The calculated band structures of (a) a unit cell of monolayer BlueP, with (b) a 2×2 supercell of monolayer BlueP by PBE functional.

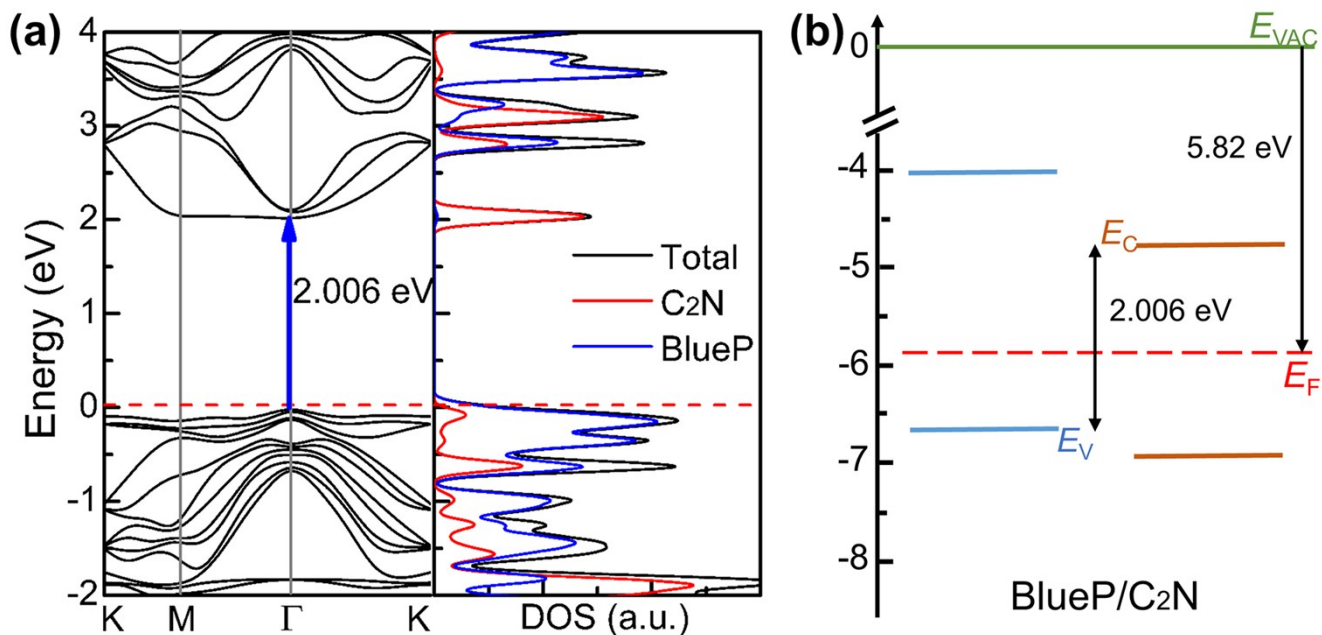

**Fig. S2** The calculated (a) band structure and DOS, along with (b) band alignment of BlueP/C<sub>2</sub>N heterojunction by HSE06 functional.

Our results demonstrate that the direct band gap at the  $\Gamma$  point for the BlueP/C<sub>2</sub>N heterojunction obtained by HSE06 is 2.006 eV, as shown in Fig. S2(a), which is larger about 0.5 eV than that of PBE one. One can see from the DOS that the CBM is dominated by C<sub>2</sub>N monolayer and the VBM is mainly determined by BlueP monolayer, coincide with the results at PBE level. It shows from Fig. S2b that a type-II heterojunction can be realized between C<sub>2</sub>N and BlueP monolayers, thus the favorable spatial separation of photogenerated electrons and holes can be expected.

The carrier effective mass can be calculated by the following equation:

$$\left(\frac{1}{m^*}\right)_{ij} = \frac{1}{\hbar^2} \frac{\partial^2 E}{\partial k_i \partial k_j}, i, j = x, y, z \quad (1)$$

From the Equation, we can obtain the effective mass of the electron (or hole) by the second derivative of the top of the valence band (or the bottom of conduction band) for the wave vector. Although  $m^*$  is a second-order tensor with nine components, it can be taken as a scalar. Three directions ( $x, y, z$ ) are calculated when we calculate energy band.

$$\frac{1}{m^*} = \frac{1}{\hbar^2} \frac{\partial^2 E(k)}{\partial k^2} \quad (2)$$

where  $k$  is the wave vector,  $\hbar$  is the reduced Planck constant, and  $E(k)$  is the dispersion relation.

Before exploring the effective mass in heterojunction, the effective masses of C<sub>2</sub>N monolayer are calculated to be  $m_e^* = 0.45m_0$ ,  $m_h^* = 5.1m_0$  ( $m_0$  is the free-electron mass). The electron effective mass and hole effective mass of BlueP monolayer are  $m_e^* = 0.11m_0$ ,  $m_h^* = 0.63m_0$ , respectively. The  $m_h^*$  of the C<sub>2</sub>N monolayer is much larger than the  $m_e^*$  of C<sub>2</sub>N, indicating much lower hole mobility in the C<sub>2</sub>N monolayer, coincide with other results.<sup>28</sup> For BlueP, the  $m_h^*$  is also higher than  $m_e^*$ , which agree well with previous reports.<sup>34</sup> In the heterojunction, holes have much higher mobilities than those of any of single layers because  $m_h^* = 0.41m_0$ , while the electron mobility is moderate with  $m_e^* = 0.61m_0$ .
